# Supplementary material
Source: PubMed Central journal article supplement (PMC14678)

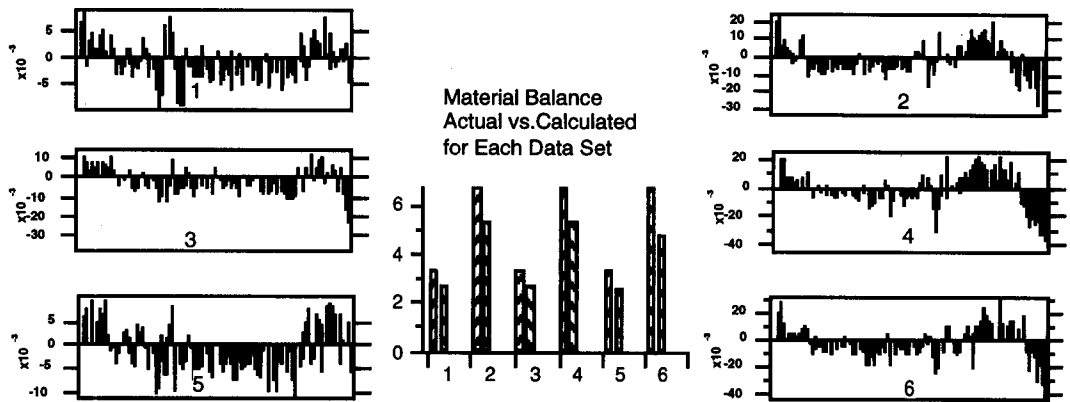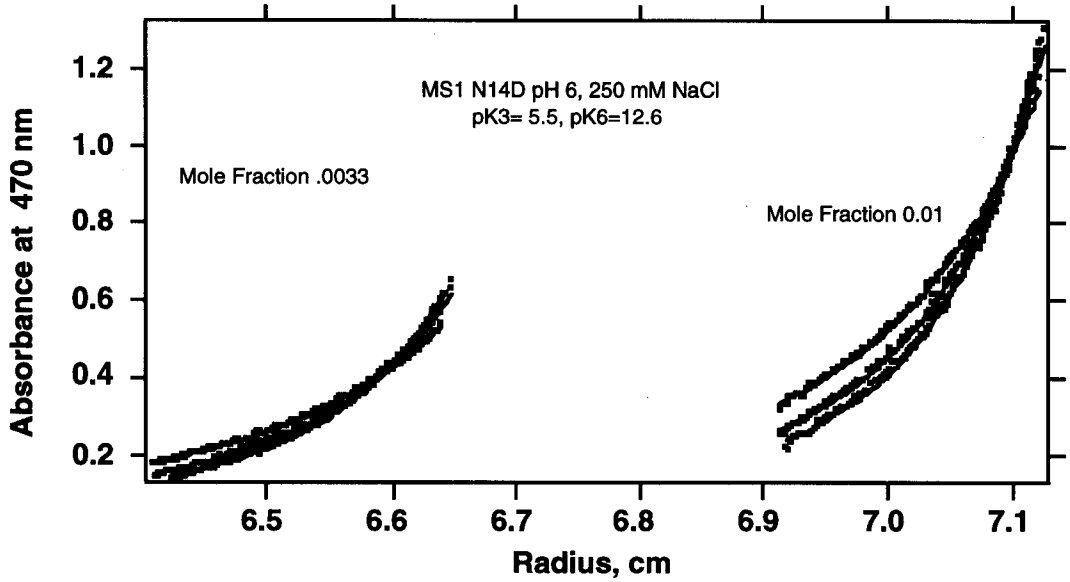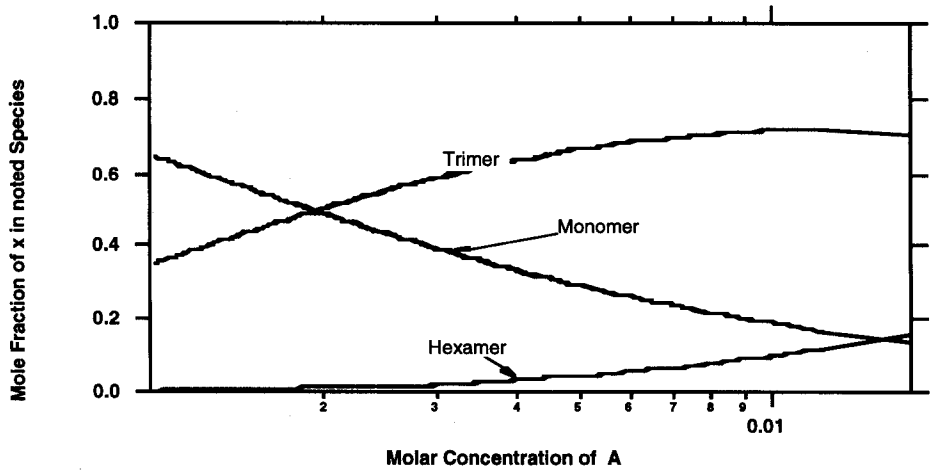

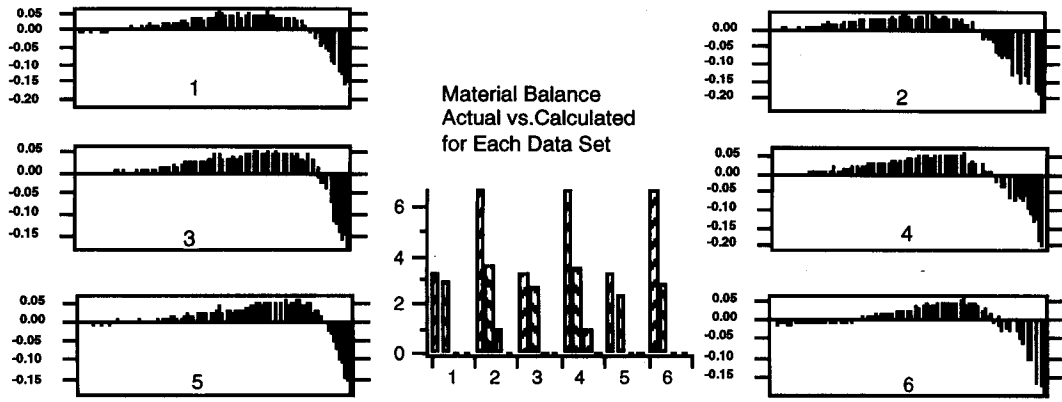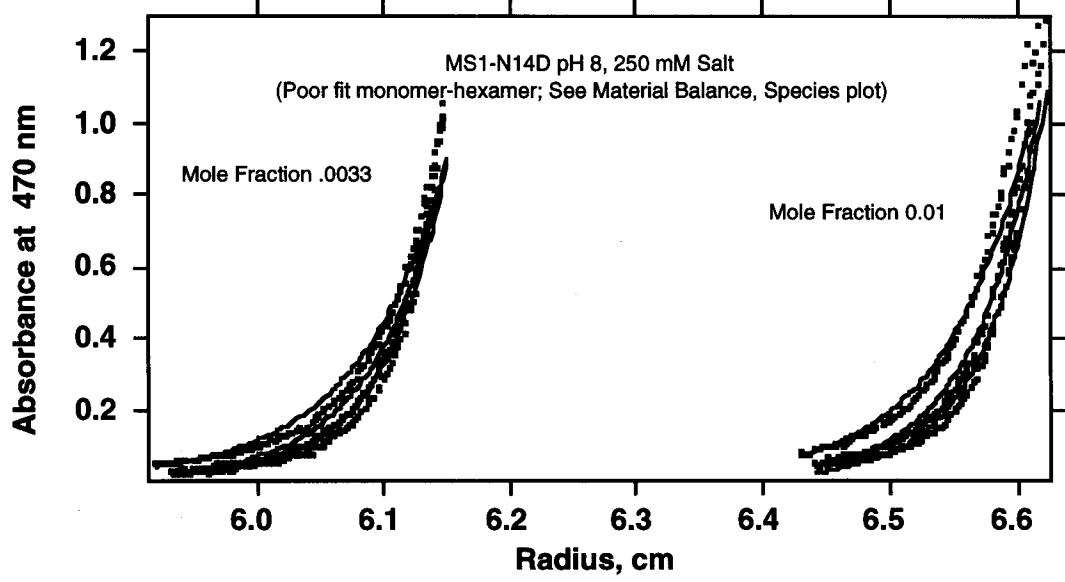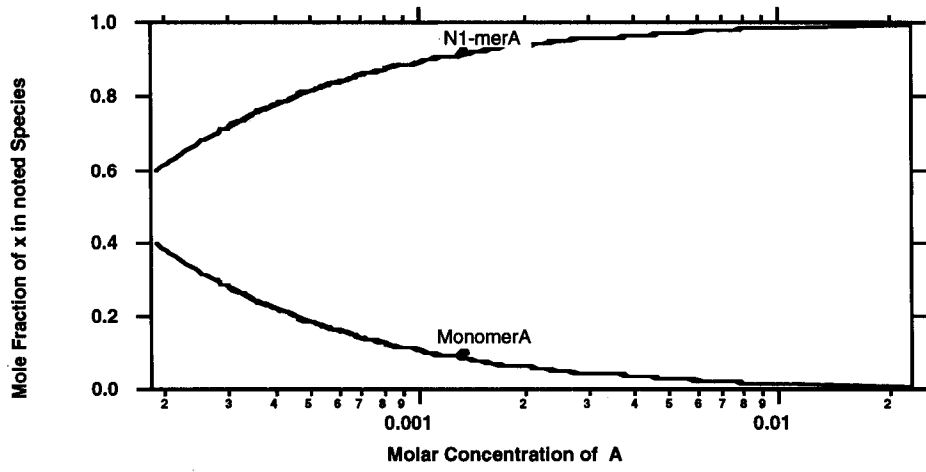

Supplement: pnas_98_3_880__3.pdf [file pnas_98_3_880__3.pdf]

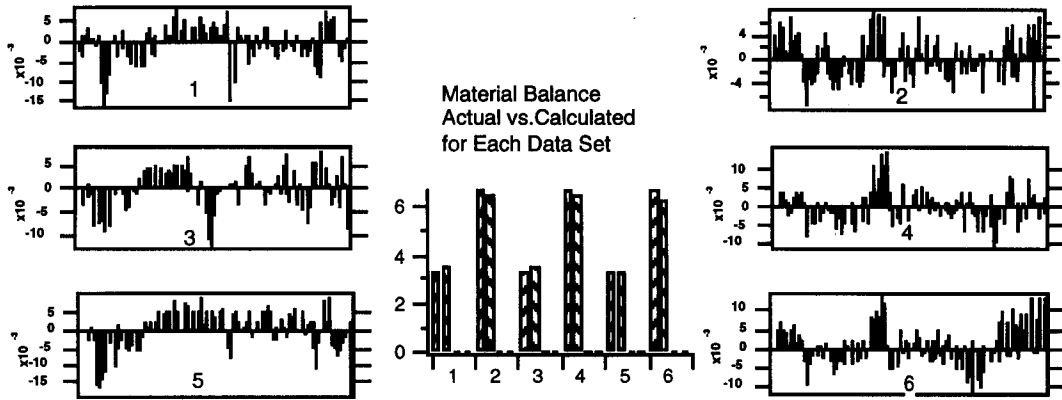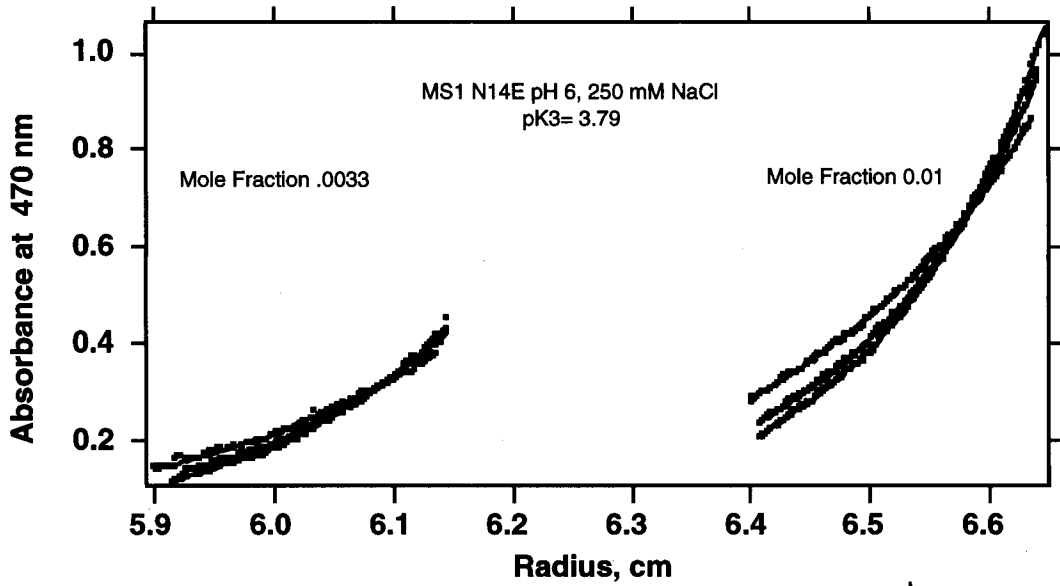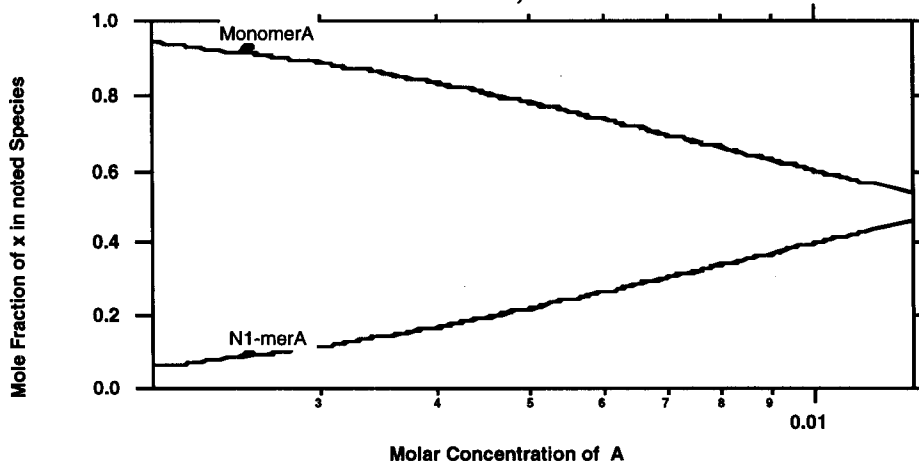

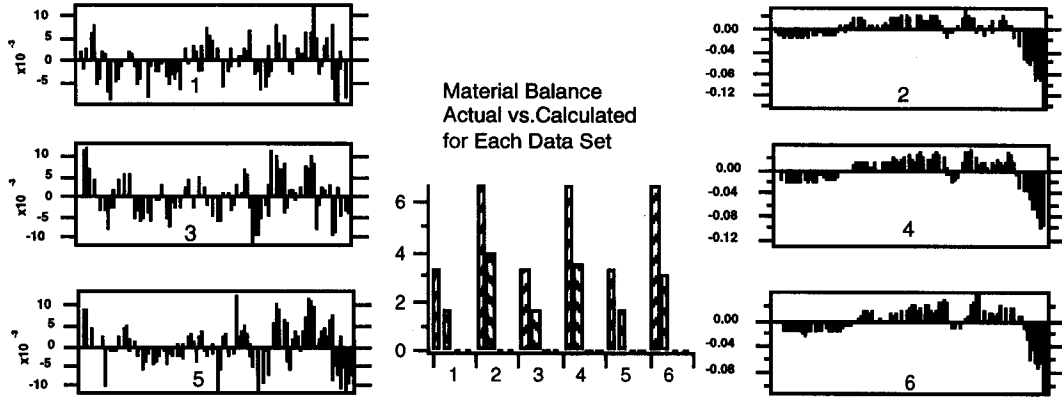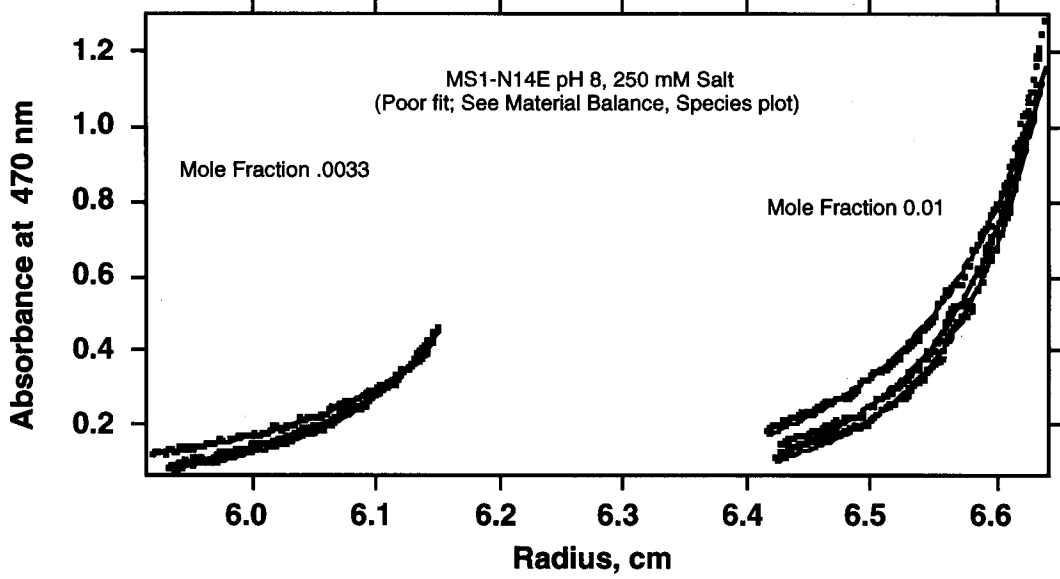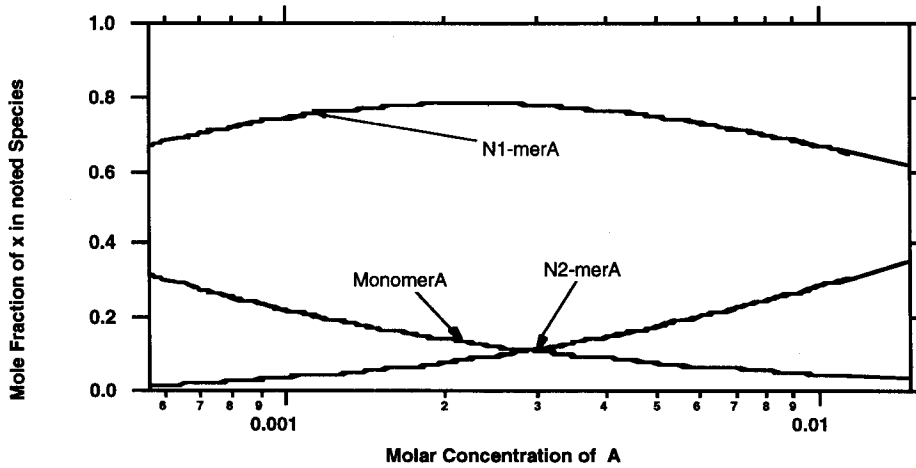

Supplement: pnas_98_3_880__5.pdf [file pnas_98_3_880__5.pdf]
